# Supplementary material
Source: PubMed Central journal article supplement (PMC3118592)
Supplement: supp_00659.2010_tableS1.pdf [file supp_00659.2010_tableS1.pdf]

Supplemental  
Table 1.

## Insulin-stimulated Increases above Basal Values

|                                | Epitrochlearis |                |               |                | Soleus                         |               |                |               |                |
|--------------------------------|----------------|----------------|---------------|----------------|--------------------------------|---------------|----------------|---------------|----------------|
|                                | 1.2 nM         |                | 30 nM         |                | 1.2 nM                         |               | 30 nM          |               |                |
|                                | AL             | CR             | AL            | CR             | AL                             | CR            | AL             | CR            |                |
| <b>2DG Uptake</b>              | 0.087 ± 0.013  | 0.183 ± 0.026* | 0.180 ± 0.010 | 0.273 ± 0.022* | <b>2DG Uptake</b>              | 0.151 ± 0.024 | 0.270 ± 0.035* | 0.344 ± 0.036 | 0.450 ± 0.043  |
| <b>pIR</b>                     | 0.125 ± 0.016  | 0.154 ± 0.047  | 0.633 ± 0.027 | 1.00 ± 0.051*  | <b>pIR</b>                     | 0.108 ± 0.027 | 0.237 ± 0.073  | 0.741 ± 0.104 | 1.081 ± 0.098* |
| <b>PI3K activity</b>           | 0.703 ± 0.428  | 0.890 ± 0.510  | 0.815 ± 0.967 | 1.607 ± 1.467  | <b>PI3K activity</b>           | 0.387 ± 0.212 | 0.314 ± 0.206  | 1.784 ± 0.522 | 1.863 ± 0.463  |
| <b>aPKC activity</b>           | 991 ± 112      | 1133 ± 137     | 1807 ± 83     | 2395 ± 342     | <b>aPKC activity</b>           | 923 ± 83      | 754 ± 182      | 1775 ± 169    | 2366 ± 187*    |
| <b>pAkt<sup>Thr308</sup></b>   | 0.081 ± 0.011  | 0.376 ± 0.048* | 0.672 ± 0.169 | 1.534 ± 0.044* | <b>pAkt<sup>Thr308</sup></b>   | 0.119 ± 0.046 | 0.366 ± 0.086* | 0.587 ± 0.070 | 1.262 ± 0.053* |
| <b>pAkt<sup>Ser473</sup></b>   | 0.030 ± 0.008  | 0.611 ± 0.180* | 0.239 ± 0.037 | 1.470 ± 0.075* | <b>pAkt<sup>Ser473</sup></b>   | 0.123 ± 0.022 | 0.221 ± 0.037* | 0.674 ± 0.083 | 1.255 ± 0.087* |
| <b>pAkt1<sup>Thr308</sup></b>  | 0.135 ± 0.038  | 0.334 ± 0.282* | 0.385 ± 0.021 | 1.548 ± 0.038* | <b>pAkt1<sup>Thr308</sup></b>  | 0.215 ± 0.059 | 0.405 ± 0.075  | 0.471 ± 0.087 | 1.379 ± 0.087* |
| <b>pAkt1<sup>Ser473</sup></b>  | 0.229 ± 0.062  | 0.624 ± 0.059* | 0.712 ± 0.061 | 1.181 ± 0.082* | <b>pAkt1<sup>Ser473</sup></b>  | 0.213 ± 0.048 | 0.512 ± 0.094* | 0.581 ± 0.107 | 1.374 ± 0.121* |
| <b>pAkt2<sup>Thr308</sup></b>  | 0.162 ± 0.041  | 0.861 ± 0.246* | 0.421 ± 0.088 | 1.490 ± 0.074* | <b>pAkt2<sup>Thr308</sup></b>  | 0.111 ± 0.023 | 0.338 ± 0.077* | 0.695 ± 0.077 | 1.035 ± 0.083* |
| <b>pAkt2<sup>Ser473</sup></b>  | 0.223 ± 0.082  | 0.683 ± 0.032* | 0.729 ± 0.091 | 1.210 ± 0.045* | <b>pAkt2<sup>Ser473</sup></b>  | 0.397 ± 0.062 | 0.564 ± 0.059  | 0.838 ± 0.061 | 1.026 ± 0.082* |
| <b>PAS-160</b>                 | 0.286 ± 0.049  | 0.617 ± 0.118* | 0.738 ± 0.069 | 0.550 ± 0.106  | <b>PAS-160</b>                 | 0.474 ± 0.074 | 0.370 ± 0.093  | 0.816 ± 0.078 | 0.681 ± 0.087  |
| <b>pAS160<sup>Thr642</sup></b> | 0.398 ± 0.060  | 0.595 ± 0.106  | 0.779 ± 0.099 | 0.519 ± 0.090  | <b>pAS160<sup>Thr642</sup></b> | 0.385 ± 0.193 | 0.545 ± 0.330  | 0.699 ± 0.143 | 0.657 ± 0.112  |
| <b>pAS160<sup>Ser588</sup></b> | 0.111 ± 0.109  | 0.517 ± 0.113* | 0.501 ± 0.135 | 0.750 ± 0.089  | <b>pAS160<sup>Ser588</sup></b> | 0.461 ± 0.190 | 0.450 ± 0.069  | 0.454 ± 0.180 | 0.561 ± 0.150  |
| <b>PAS-150</b>                 | 0.179 ± 0.163  | 0.511 ± 0.139  | 0.407 ± 0.148 | 0.496 ± 0.111  | <b>PAS-150</b>                 | 0.326 ± 0.094 | 0.247 ± 0.051  | 0.371 ± 0.133 | 0.435 ± 0.089  |

The insulin stimulated increase ( $\Delta$ -insulin values) for 2-DG uptake and insulin signaling molecules calculated by subtracting the value of the 0 nM group from the values of 1.2 nM and 30 nM insulin for each rat. n=8-14 per group. \*P < 0.05, CR versus AL in the same insulin treatment group.
